1 Metagenomic analysis of the cow, sheep, reindeer and red deer rumen

2 Authors: Laura Glendinning<sup>1\*</sup>, Buğra Genç<sup>2#</sup>, R John Wallace<sup>2</sup>, Mick Watson<sup>1</sup>

3

4 <sup>1</sup>Genetics and Genomics, The Roslin Institute and Royal (Dick) School of Veterinary Studies,

5 University of Edinburgh, Edinburgh, Midlothian, United Kingdom

6 <sup>2</sup>Rowett Institute, University of Aberdeen, Ashgrove Rd W, Aberdeen, Aberdeenshire, United

7 Kingdom

8 #Current address: Ondokuz Mayıs University Veterinary Medicine Faculty Department of Laboratory

9 Animals, Atakum, Samsun, Turkey

10

11 \*Corresponding author: [laura.glendinning@roslin.ed.ac.uk](mailto:laura.glendinning@roslin.ed.ac.uk)

12

13 **Keywords:** microbiota, deer, cow, sheep, reindeer, mag

14 **Repositories:** European Nucleotide Archive: PRJEB34458. Edinburgh DataShare:

15 <https://doi.org/10.7488/ds/2640>.

16 **Abstract:**

17 The rumen microbiota comprises a community of microorganisms which specialise in the  
18 degradation of complex carbohydrates from plant-based feed. These microbes play a highly  
19 important role in ruminant nutrition and could also act as sources of industrially useful enzymes. In  
20 this study, we performed a metagenomic analysis of samples taken from the ruminal contents of  
21 cattle (*Bos Taurus*), sheep (*Ovis aries*), reindeer (*Rangifer tarandus*) and red deer (*Cervus elaphus*).  
22 We constructed 391 metagenome-assembled genomes originating from 16 microbial phyla. We  
23 compared our genomes to other publically available microbial genomes and found that they  
24 contained 279 novel species. We also found significant differences between the microbiota of  
25 different ruminant species in terms of the abundance of microbial taxonomies, carbohydrate-active  
26 enzyme genes and KEGG orthologs. However, we found that the vast majority of carbohydrate-  
27 active enzymes were present in all of our sample types, which may indicate that there is a core set of  
28 these enzymes which are present across ruminants and are independent of diet and environmental  
29 conditions. We present a dataset of rumen-derived genomes which in combination with other  
30 publicly-available rumen genomes can be used as a reference dataset in future metagenomic  
31 studies.

32

33 **Data Summary:**

34 The paired-read fastq files supporting the conclusions of this article are available in the European  
35 Nucleotide Archive repository (<https://www.ebi.ac.uk/ena/browser/view/PRJEB34458>). The RUG  
36 fasta files supporting the conclusions of this article are available in the Edinburgh DataShare  
37 repository (<https://doi.org/10.7488/ds/2640>).

38 **Introduction:**

39 The microbial communities which inhabit the rumen contain a mixture of bacteria, fungi, protozoa,  
40 viruses and archaea, and through fermentation are able to convert complex plant carbohydrates into  
41 short-chain volatile fatty acids. The microbial pathways present have a large impact on feed  
42 efficiency (1-3), alongside other important production traits such as milk and fat yield (4, 5).

43 Understanding the processes by which food is digested in the rumen may allow us to improve feed  
44 efficiency in ruminants (1), either by the production of enzymes isolated from microbes (6) or by  
45 manipulating the microbiota through the use of pre- or probiotics (7). There are also other potential  
46 industrial uses for the proteins produced by ruminal microbes, for example in processing biofuels,  
47 bioremediation, processing pulp/paper and textile manufacturing (8-11). Ruminants are also the  
48 largest source of anthropogenic methane emissions and gaining a greater understanding of which  
49 microbes are important in methane production could lead to improved methane mitigation  
50 strategies (7, 12-16).

51 While inroads have been made towards culturing members of the ruminal microbiota (17, 18) there  
52 are still many members which have not been characterised. Metagenomics is a powerful tool which  
53 allows us to examine the entire genetic repertoire of the rumen microbiota without the need for  
54 culturing. Our group has previously published thousands of metagenome assembled genomes from  
55 cattle rumen samples (19, 20) and hundreds of genomes from chicken caecal samples (21), many of  
56 which were identified as novel species.

57 Several studies have examined the rumen microbiota using metagenomic techniques in cattle and  
58 sheep; however, less effort has been made to characterise the microbiota of other ruminant species  
59 which may be less commercially-important but which could harbour microbes which could be  
60 industrially useful. For example, wild ruminants are likely to consume a far more diverse diet than  
61 farm-raised individuals, and are therefore likely to contain microbes which are able to digest  
62 different substrates. In this paper we analyse rumen metagenomic data from four ruminant species:

63 cattle (*Bos Taurus*), sheep (*Ovis aries*), red deer (*Cervus elaphus*) and reindeer (*Rangifer tarandus*).  
64 We compare the microbiota of these species taxonomically and functionally and construct 391  
65 named rumen-uncultured genomes (RUGs), representing 372 putative novel strains and 279 putative  
66 novel species.

67

## 68 **Methods:**

### 69 **Experimental design**

70 Reindeer (*Rangifer tarandus*: Grazing mixed vegetation, n=2) and red deer (*Cervus elaphus*: Grazing  
71 mixed vegetation, n=4) were shot in the wild, and ruminal digesta samples were collected  
72 immediately. Samples were taken from Holstein cattle (*Bos Taurus*: Fed total mixed ration (once a  
73 day), n=4) and Finn-Dorset cross sheep (*Ovis aries*: Grazing mixed pasture, n=2) via a rumen cannula.  
74 Samples were taken from sheep after morning grazing. Sheep sampling was performed as described  
75 in McKain et al. (22). Cattle samples were taken 3 hours post feeding. Samples were collected from  
76 the bovine rumen in the following locations: top near cannula, middle at the front of the rumen,  
77 middle towards the back of the rumen and bottom (approximately 45cm down from the entrance to  
78 the rumen). Digesta samples were mixed with buffer containing glycerol as a cryoprotectant (22).  
79 The mixtures were kept on ice for 1-2 hours then frozen at -20°C. DNA extraction was performed  
80 using repeated bead beating plus column filtration, as described in (23). Shotgun sequencing was  
81 performed on an Illumina HiSeq 2000, producing an average of 1626 million paired reads per sample,  
82 of 100bp or 150bp in length.

83

### 84 **Bioinformatics**

85 Illumina adaptors were removed using trimmomatic (24) (v.0.36). IDBA-UD (25) (v.1.1.3) with the  
86 options --num\_threads 16 --pre\_correction --min\_contig 300 was used to perform single sample

87 assemblies. After indexing using BWA index (v.0.7.15), BWA-MEM was used to map reads to  
88 assemblies (26). BAM files were created by SAM tools (27) (v.1.3.1) and coverage was calculated  
89 using the command `jgi_summarize_bam_contig_depths` from the MetaBAT2 (v.2.11.1) software  
90 package (28). A coassembly was carried out on all samples using MEGAHIT (29) (v.1.1.1) with the  
91 options `--continue --kmin-1pass -m 100e+10 --k-list 27,37,47,57,67,77,87 --min-contig-len 1000 -t 16`.  
92 After filtering out reads which were <2kb, indexing and mapping were performed as for single  
93 assemblies.

94 Metagenomic binning was carried out using MetaBAT2 with the options `--minContigLength 2000, --`  
95 `minContigDepth 2`. From the single-assemblies, 1691 bins were created and from the co-assembly  
96 2508 bins were created. Completeness and contamination of bins were calculated using CheckM  
97 (options: `lineage_wf, -t 16, -x fa`) (v.1.0.5), and the bins were dereplicated using dRep (30) (options:  
98 `dereplicate_wf -p 16 -comp 80 -con 10 -str 100 --strW 0`) (v.1.1.2). Thus, bins were discarded if their  
99 completeness was <80% or if they had contamination >10%. The dereplicated 'winning' bins are  
100 referred to below as RUGs. MAGpy was used to compare the RUGs to public datasets (31).

101 Taxonomies were assigned to MAGs using GTDB-Tk (32). Trees produced by MAGpy were rerooted  
102 at the branch between archaea and bacteria using Figtree (33) (v.1.4.4) and visualised using  
103 GraPhlAn (34) (v.0.9.7). For submission to public repositories, our RUGs were named as the lowest  
104 taxonomic level at which NCBI and GTDB-Tk matched. The taxonomies assigned to RUGs were  
105 manually checked against the taxonomic tree and improved accordingly.

106 Carbohydrate-active enzymes (CAZymes) were identified using dbCAN2 (version 7, 24<sup>th</sup> August 2018)  
107 by comparing RUG proteins to the CAZy database (35). RUG proteins were compared to the KEGG  
108 database (downloaded on Sept 15th 2018) (36) using DIAMOND (37) (v0.9.21). KEGG hits for which  
109 the alignment length was  $\geq 90\%$  of the query length were retained. The likely KEGG ortholog group  
110 for each RUG protein was inferred from the DIAMOND search results and the KEGG database.  
111 CAZyme and KEGG ortholog abundances were calculated as the sum of the reads mapping to RUG

112 proteins within each group after using DIAMOND to align reads to the RUG proteins. PULpy was used  
113 to identify polysaccharide utilisation loci (38).

114 Statistical analyses were carried out within R (version 3.5.1). The ggplot2 (39) package was used to  
115 construct scatter plots and NMDS graphs. The vegan package (40) was used to create NMDS axes  
116 using the Bray–Curtis dissimilarity. The Adonis function from the vegan package was used to perform  
117 PERMANOVA analyses and DeSeq2 (41) was used to calculate differences in coverage for individual  
118 CAZymes, KEGG orthologs and RUGs. UpSet graphs were constructed using the UpSetR package (42).  
119 Taxonomies were assigned to paired sequence reads with Kraken (43) using a custom kraken  
120 database consisting of RefSeq complete genomes with our RUGs and the rumen superset (20)  
121 added. Prior to statistical analyses (excluding DeSeq2) and graph construction, data was subsampled.  
122 For RUGs, subsampling to the lowest sample coverage was performed. CAZymes and KEGG orthologs  
123 were subsampled to the lowest sample abundance.

124

## 125 **Results:**

### 126 **Construction of RUGs from rumen sequencing data**

127 We produced 979G of Illumina sequencing data from 12 samples then performed a metagenomic  
128 assembly of single samples and a co-assembly of all samples. This created a set of 391 dereplicated  
129 genomes (99% ANI (average nucleotide identity)) with estimated completeness  $\geq 80\%$  and estimated  
130 contamination  $\leq 10\%$  (**Additional File 1: Fig 1**). 284 of these genomes were produced from the single-  
131 sample assemblies and 107 were produced from the co-assemblies. 172 genomes were  $>90\%$   
132 complete with contamination  $<5\%$ , and would therefore be defined as high-quality draft genomes by  
133 Bower et al. (44). The distribution of these RUGs between our samples can be found in **Additional**  
134 **file 2** (based on coverage). **Additional file 3** contains the predicted taxonomic assignment for each  
135 RUG while **Fig 1** shows a phylogenetic tree of the genomes. The tree is dominated by the

136 *Bacteroidota* (136 RUGs: All order *Bacteroidales*) and the *Firmicutes\_A* (121 RUGs), followed by  
137 lesser numbers of the *Firmicutes\_C* (40 RUGs), *Synergistota* (20 RUGs: All family *Aminobacteriaceae*),  
138 *Firmicutes* (19 RUGs), *Proteobacteria* (15 RUGs), *Cyanobacteriota* (9 RUGs: All family  
139 *Gastranaerophilaceae*), *Actinobacteriota* (7 RUGs), *Euryarchaeota* (7 RUGs: All family  
140 *Methanobacteriaceae*), *Spirochaetota* (5 RUGs), *Elusimicrobiota* (3 RUGs: All family  
141 *Endomicrobiaceae*), *UBP6* (3 RUGs: All genus *UBA1177*), *Fibrobacterota* (2 RUGs: All genus  
142 *Fibrobacter*), *Rifl bacteria* (2 RUGs: All family *UBA8953*), *Chloroflexota* (1 RUGs: family  
143 *Anaerolineaceae*) and *Desulfobacterota* (1 RUGs: genus *Desulfovibrio*). All members of the phylum  
144 *Firmicutes\_A* belonged to the *Clostridia* class: orders *4C28d-15* (n=9), *CAG-41* (n=3),  
145 *Christensenellales* (n=4), *Lachnospirales* (n=56), *Oscillospirales* (n=45), *Peptostreptococcales* (n=2)  
146 and *Saccharofermentanales* (n=2). *Firmicutes\_C* contains the orders *Acidaminococcales* (n=8) and  
147 *Selenomonadales* (n=32). The phylum *Firmicutes* contained the orders *Acholeplasmatales* (n=3),  
148 *Erysipelotrichales* (n=1), *Izimaplasmatales* (n=1), *ML615J-28* (n=1), *Mycoplasmatales* (n=1). *RFN20*  
149 (n=7) and *RF39* (n=5), The *Actinobacteria* contained the orders *Actinomycetales* (n=1) and  
150 *Coriobacteriales* (n=6). The *Proteobacteria* phylum contains the orders *Enterobacterales* (n=4),  
151 *Paracaedibacterales* (n=1), *RF32* (n=8) and *UBA3830* (n=2). The *Spirochaetota* contains the orders  
152 *Sphaerochaetales* (n=1) and *Treponematales* (n=4).

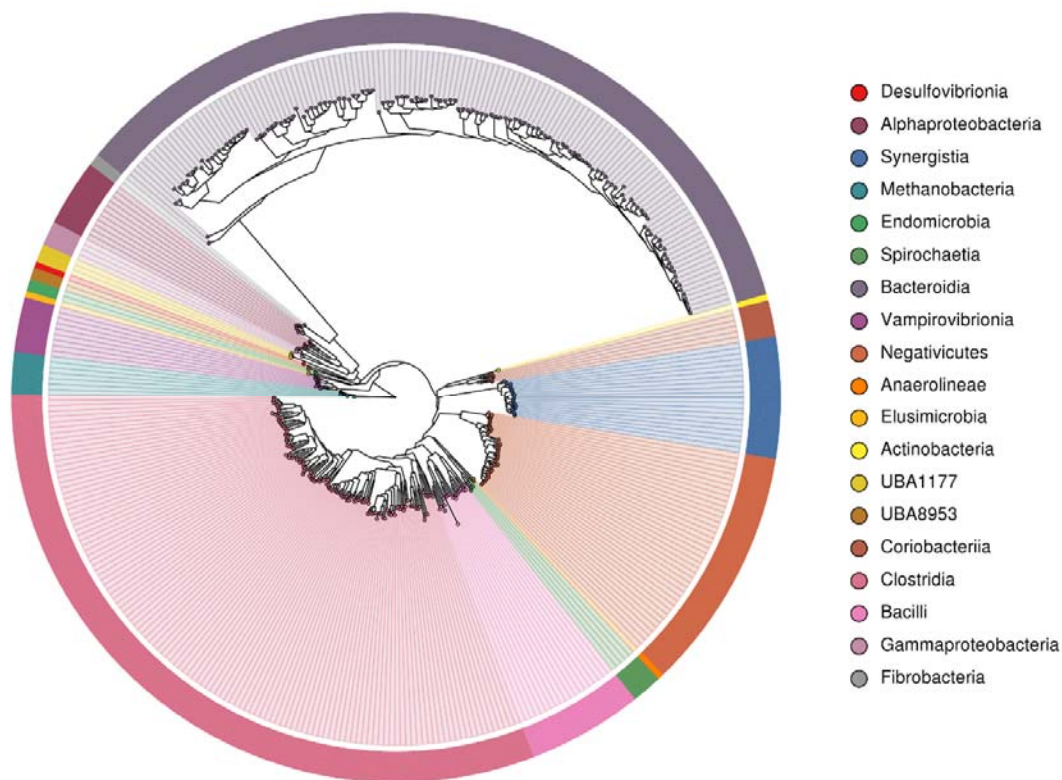

153

154 **Fig 1: Phylogenetic tree of the 391 draft microbial genomes from rumen samples, labelled by**  
155 **taxonomic class. Taxonomies were defined by GTDB-Tk.**

156

157 After sub-sampling, we found that samples from different ruminant species clustered significantly  
158 separately by abundance of RUGs (PERMANOVA:  $P = 3e-05$ ). This may be due to the fact that the  
159 vast majority of RUGs were only found in a single host species (**Fig 2**), including 111 RUGs in red  
160 deer, 78 RUGs in reindeer, 40 RUGs in cow and 31 RUGs in sheep. Only 3 RUGs were found in  $\geq 1X$   
161 average coverage in all species: uncultured *Bacteroidaceae* sp. RUG30019, uncultured *Prevotella* sp.  
162 RUG30028 and uncultured *Prevotella* sp. RUG30114.



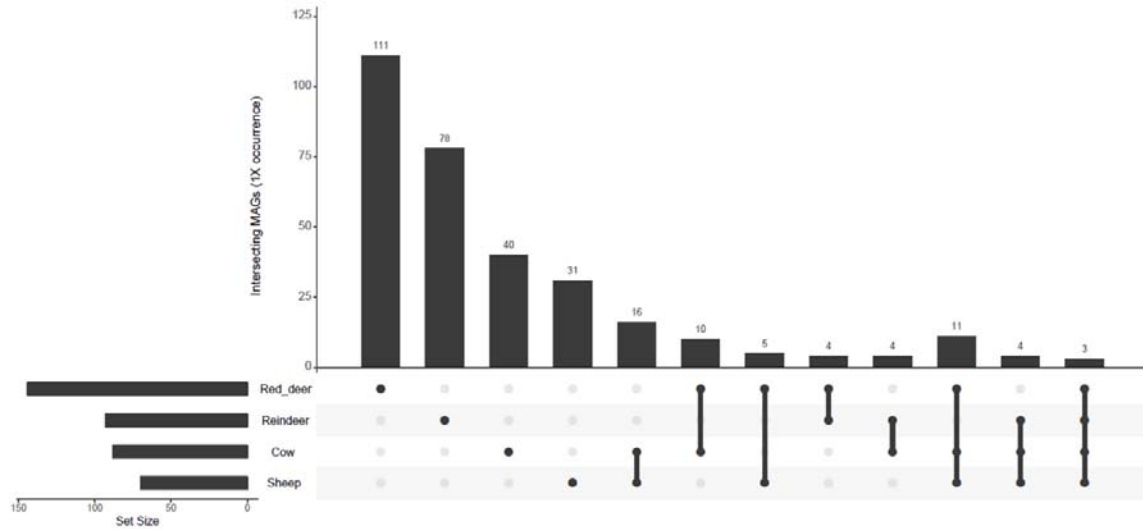

163

164 **Fig 2: UpSetR graph showing the number of shared microbial genomes at average 1X coverage**  
165 **(after sub-sampling to equal depth) within four ruminant species.**

166

167 We compared our RUGs to microbial genomes which had previously been sequenced from the  
168 rumen to determine if we had discovered any novel strains or species. We dereplicated our RUGs at  
169 99% and 95% ANI to a “superset” of genomes containing rumen RUGs previously produced by our  
170 group (20), Hess et al. (11), Parks et al. (45), Solden et al. (46) and Svartström et al. (47) and the  
171 genomes from the Hungate collection (17). After dereplication at 99% and the removal of any RUGs  
172 with  $\geq 99\%$  ANI to an existing genome (as assigned by GTDB-Tk) or which clustered with members of  
173 the superset, 372 of our RUGs remained, representing putative novel strains. After dereplication at  
174 95% and the removal of any RUGs with  $\geq 95\%$  ANI to an existing genome (assigned by GTDB-tk) or  
175 which clustered with members of the superset, 279 of our RUGs remained, representing putative  
176 novel species. The majority of these species originated from single-sample assemblies: 110 from red  
177 deer samples, 68 from reindeer samples, 23 from sheep samples and 1 from cattle samples,  
178 suggesting that many novel microbial species remain to be discovered from non-cattle ruminant  
179 hosts. These novel species are taxonomically diverse, with members belonging to the phyla  
180 *Bacteroidota* (n = 97), *Firmicutes\_A* (n = 85), *Firmicutes\_C* (n = 27), *Firmicutes* (n = 16), *Synergistota*

181 (n = 14), *Proteobacteria* (n = 11), *Cyanobacteriota* (n = 9), *Actinobacteriota* (n = 5), *Spirochaetota* (n =  
182 4), *Euryarchaeota* (n = 3), *Elusimicrobiota* (n = 3), *Rifl bacteria* (n = 2), *Chloroflexota* (n = 1),  
183 *Desulfobacterota* (n = 1) and *UBP6* (n = 1).

184 31 of our total RUGs were able to be taxonomically identified to species level and these contain  
185 bacteria which are commonly isolated from the rumen including novel strains of *Bacteroidales*  
186 *bacterium UBA1184* (45), *Bacteroidales bacterium UBA3292* (45), *Butyrivibrio fibrisolvens*,  
187 *Escherichia coli*, *Fibrobacter sp. UWB2* (48), *Lachnospiraceae bacterium AC3007* (17),  
188 *Lachnospiraceae bacterium UBA2932* (45), *Methanobrevibacter sp. UBA188* (45),  
189 *Methanobrevibacter sp. UBA212* (45), *Prevotella sp. UBA2859* (45), *Ruminococcaceae bacterium*  
190 *UBA3812* (45), *Ruminococcus sp. UBA2836* (45), *Sarcina sp. DSM 11001* (17), *Selenomonas sp.*  
191 *AE3005* (17), *Succiniclasticum ruminis* and *Succinivibrio dextrinosolvens*.

192

### 193 **Comparing microbial taxonomies, CAZymes and KEGG orthologs between ruminant species**

194 We assigned taxonomies to paired sequence reads using our custom kraken database containing  
195 RefSeq complete genomes, our RUGs, and the superset of rumen isolated microbial genomes. After  
196 subsampling we compared the abundance of members of the microbiota in different ruminant  
197 species at multiple taxonomic levels. Averaging reads across rumens species, the vast majority of  
198 reads mapped to bacteria (Sheep: 97%, Cow: 97%, Reindeer: 92%, Red deer: 98%) with smaller  
199 amounts of archaea (Sheep: 2.3%, Cow: 2.1%, Reindeer: 6.3%, Red deer: 1.9%) and Eukaryota  
200 (Sheep: 0.23%, Cow: 1.3%, Reindeer: 1.8%, Red deer: 0.56%). Eukaryota reads originated primarily  
201 from fungi and protists. In all ruminants, *Bacteroidetes* was the most abundant phylum (Sheep: 64%,  
202 Cow: 65% Reindeer: 54% Red deer: 52%), with *Firmicutes* being the second most abundant (Sheep:  
203 29%, Cow: 26% Reindeer: 26% Red deer: 38%). Using PERMANOVA, significant differences in the  
204 abundance of taxonomies between ruminant species were found at both high (Kingdom: P =

205 0.01058, Phylum:  $P = 0.00017$ ) and low (Family:  $P = 1e-05$ , Genus:  $P = 3e-05$ ) taxonomic levels

206 **(Additional File 1: Fig 2).**

207 We also compared the abundance of genes encoding for specific CAZymes between species. These  
208 enzymes are responsible for the synthesis, binding and metabolism of carbohydrates. The  
209 carbohydrate esterases (CEs), glycoside hydrolases (GHs), glycosyltransferases (GTs) and  
210 polysaccharide lyases (PLs) act to degrade cellulose, hemicellulose and other carbohydrates which  
211 could otherwise not be digested by the host. Non-catalytic carbohydrate-binding modules (CBMs)  
212 bind to specific carbohydrates, increasing the efficiency of enzymatic degradation (49). The auxiliary  
213 activities (AAs) redox enzymes are reclassified CBMs which are lytic polysaccharide monooxygenases  
214 (50). In our samples we found the following numbers of these CAZyme families: 6 AAs redox  
215 enzymes, 39 CBMs, 14 CEs, 191 GHs, 61 GTs and 27 PLs. The ten most abundant GHs in the different  
216 ruminant species were: for cows GH2, GH3, GH31, GH97, GH28, GH51, GH43\_10, GH105, GH10 and  
217 GH95; for sheep GH2, GH3, GH28, GH31, GH97, GH32, GH51, GH77, GH78 and GH95; for red deer  
218 GH2, GH3, GH31, GH97, GH77, GH32, GH51, GH109, GH28 and GH78; and for reindeer GH2, GH3,  
219 GH92, GH109, GH97, GH13, GH31, GH78, GH28 and GH77. Different ruminant species were found to  
220 have significantly differently abundant CAZyme genes (PERMANOVA:  $P = 1e-05$ , **Additional File 1: Fig**  
221 **3**). However, it should be noted that the vast majority of CAZyme families were found in all sample  
222 types (**Fig 3**), indicating that there exists a set of CAZymes which are present across ruminant species  
223 consuming different diets and living in vastly different conditions.

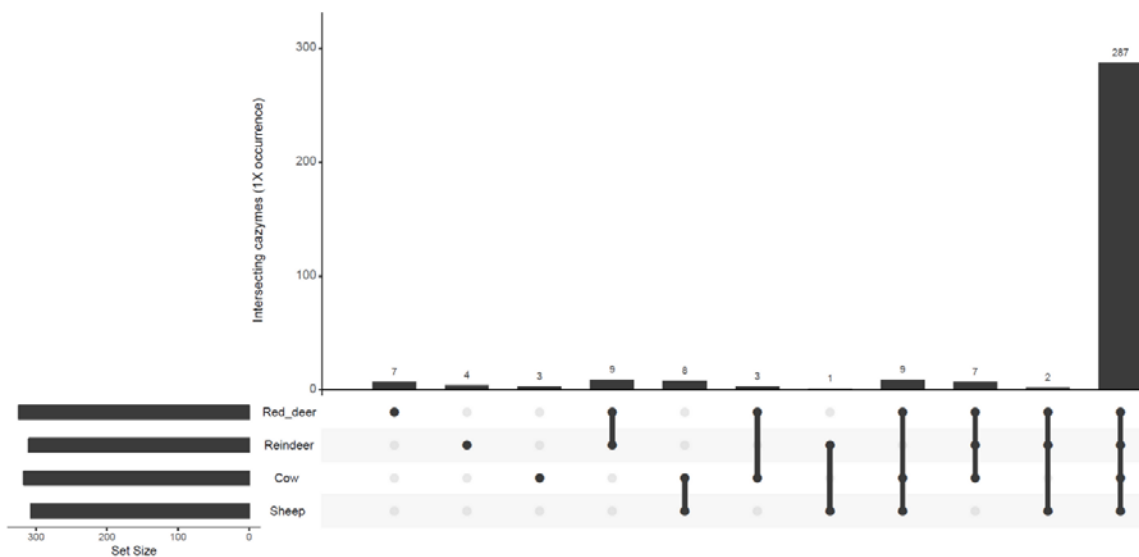

224

225 **Fig 3: UpSetR graph showing the number of shared CAZyme families at average 1X coverage within**  
226 **four ruminant species.**

227

228 DeSeq2 was used to identify specific CAZymes which were significantly more abundant in one  
229 ruminant species vs another (**Additional file 4**). Those CAZymes which were consistently more  
230 abundant in specific species when compared to other species are listed in **Tables 1-4**.

231 **Table 1: CAZymes (Carbohydrate-active enzymes) which were consistently more abundant in**  
 232 **cattle.**

| <b>CAZyme</b>                       | <b>Deer -<br/>adjusted p-<br/>value</b> | <b>Sheep -<br/>adjusted p-<br/>value</b> | <b>Reindeer -<br/>adjusted p-value</b> |
|-------------------------------------|-----------------------------------------|------------------------------------------|----------------------------------------|
| <b>Carbohydrate-binding modules</b> |                                         |                                          |                                        |
| CBM11                               | 0.000113                                | 1.81E-05                                 | 8.41E-05                               |
| CBM22                               | 0.000996                                | 0.000958                                 | 0.004915                               |
| CBM25                               | 0.000571                                | 0.010859                                 | 0.005573                               |
| CBM6                                | 4.32E-11                                | 0.02129                                  | 1.91E-25                               |
| CBM74                               | 4.51E-06                                | 0.009696                                 | 0.00389                                |
| <b>Carbohydrate esterases</b>       |                                         |                                          |                                        |
| CE15                                | 1.03E-07                                | 0.000403                                 | 0.000357                               |
| CE6                                 | 6.57E-13                                | 0.000634                                 | 1.07E-27                               |
| <b>Glycoside hydrolases</b>         |                                         |                                          |                                        |
| GH105                               | 8.55E-10                                | 0.0195                                   | 1.22E-14                               |
| GH11                                | 0.000134                                | 0.000687                                 | 2.24E-05                               |
| GH115                               | 0.000737                                | 0.018632                                 | 1.91E-17                               |
| GH13_28                             | 7.54E-06                                | 0.012113                                 | 0.042438                               |
| GH130                               | 1.02E-08                                | 2.69E-06                                 | 0.02559                                |
| GH146                               | 0.011892                                | 0.032424                                 | 3.57E-06                               |
| GH31                                | 4.20E-08                                | 0.000243                                 | 7.31E-10                               |
| GH35                                | 3.11E-06                                | 0.003975                                 | 5.19E-10                               |
| GH36                                | 0.001473                                | 0.002527                                 | 1.22E-13                               |
| GH43_1                              | 5.48E-12                                | 6.03E-05                                 | 2.36E-22                               |

|         |          |          |          |
|---------|----------|----------|----------|
| GH43_24 | 3.66E-06 | 0.000849 | 0.022236 |
| GH43_29 | 5.69E-10 | 0.000779 | 3.84E-65 |
| GH43_35 | 1.76E-06 | 0.018491 | 4.78E-29 |
| GH43_5  | 4.79E-16 | 0.011903 | 2.98E-40 |
| GH43_7  | 2.36E-09 | 0.012453 | 1.60E-36 |
| GH45    | 1.13E-05 | 0.000541 | 0.001412 |
| GH5_10  | 9.78E-05 | 0.000118 | 0.000164 |
| GH5_38  | 1.36E-11 | 0.022559 | 1.78E-37 |
| GH5_39  | 6.13E-05 | 0.000849 | 0.02559  |
| GH5_52  | 0.00487  | 0.015377 | 0.003089 |
| GH51    | 6.44E-08 | 0.011587 | 2.36E-12 |
| GH67    | 1.50E-11 | 0.001929 | 1.45E-31 |
| GH8     | 4.01E-10 | 0.000212 | 2.96E-31 |
| GH9     | 1.12E-06 | 1.08E-07 | 0.002527 |
| GH94    | 1.45E-05 | 5.96E-13 | 0.000853 |

233

234 **Table 2: CAZymes (Carbohydrate-active enzymes) which were consistently more abundant in**  
 235 **sheep.**

| <b>CAZyme</b>                | <b>Cow - adjusted<br/>p-value</b> | <b>Deer -<br/>adjusted p-<br/>value</b> | <b>Reindeer -<br/>adjusted p-value</b> |
|------------------------------|-----------------------------------|-----------------------------------------|----------------------------------------|
| Carbohydrate-binding modules |                                   |                                         |                                        |
| CBM27                        | 0.019613                          | 1.62E-07                                | 1.13E-05                               |
| Carbohydrate esterases       |                                   |                                         |                                        |
| CE8                          | 0.021156                          | 1.65E-08                                | 4.29E-14                               |
| Glycoside hydrolases         |                                   |                                         |                                        |
| GH144                        | 6.75E-05                          | 0.003343                                | 0.034267                               |
| GH30_8                       | 0.026986                          | 0.0002685                               | 2.49E-32                               |
| GH53                         | 0.000983                          | 6.98E-14                                | 9.02E-14                               |
| Glycosyltransferases         |                                   |                                         |                                        |
| GT69                         | 7.60E-05                          | 5.21E-05                                | 4.40E-06                               |
| GT7                          | 3.50E-08                          | 0.0002904                               | 0.000314                               |
| Polysaccharide lyases        |                                   |                                         |                                        |
| PL10                         | 0.022559                          | 2.52E-07                                | 3.35E-22                               |

236

237 **Table 3: CAZymes (Carbohydrate-active enzymes) which were consistently more abundant in red**  
 238 **deer.**

| CAZyme                       | Cow - adjusted p-value | Reindeer - adjusted p-value | Sheep - adjusted p-value |
|------------------------------|------------------------|-----------------------------|--------------------------|
| Carbohydrate-binding modules |                        |                             |                          |
| CBM34                        | 2.18E-22               | 3.69E-13                    | 0.049585                 |
| CBM42                        | 0.005095               | 0.003958                    | 0.000579                 |
| CBM54                        | 2.87E-14               | 4.60E-07                    | 0.000154                 |
| CBM58                        | 5.65E-05               | 0.00122                     | 0.000348                 |
| Carbohydrate esterases       |                        |                             |                          |
| CE13                         | 0.002535               | 5.30E-06                    | 0.006324                 |
| Glycoside hydrolases         |                        |                             |                          |
| GH13_20                      | 3.56E-09               | 0.014494                    | 0.021084                 |
| GH13_29                      | 2.22E-40               | 4.90E-08                    | 0.006428                 |
| GH13_4                       | 9.39E-08               | 0.000614                    | 0.000579                 |
| GH147                        | 0.00095                | 0.000495                    | 0.000842                 |
| GH148                        | 5.24E-10               | 1.92E-08                    | 0.0105                   |
| GH24                         | 5.09E-23               | 0.00023                     | 1.24E-05                 |
| GH43                         | 0.010658               | 0.000118                    | 0.024375                 |
| GH43_11                      | 4.01E-10               | 0.004229                    | 0.024919                 |
| GH43_21                      | 3.74E-06               | 0.004636                    | 0.000375                 |
| GH5_44                       | 8.22E-23               | 0.000382                    | 0.001021                 |
| Glycosyltransferases         |                        |                             |                          |
| GT23                         | 2.31E-11               | 0.00713                     | 0.036234                 |
| Polysaccharide lyases        |                        |                             |                          |



|     |          |          |          |
|-----|----------|----------|----------|
| PL4 | 4.20E-69 | 1.94E-19 | 2.12E-44 |
|-----|----------|----------|----------|

239

240 **Table 4: CAZymes (Carbohydrate-active enzymes) which were consistently more abundant in**

241 **reindeer.**

| CAZyme                       | Cow - adjusted p-value | Deer - adjusted p-value | Sheep - adjusted p-value |
|------------------------------|------------------------|-------------------------|--------------------------|
| Carbohydrate-binding modules |                        |                         |                          |
| CBM32                        | 4.15E-29               | 8.21E-08                | 4.63E-11                 |
| CBM41                        | 0.00392                | 1.73E-05                | 1.71E-11                 |
| CBM62                        | 5.74E-06               | 1.52E-05                | 1.95E-09                 |
| CBM66                        | 2.12E-29               | 1.66E-13                | 3.43E-11                 |
| CBM67                        | 6.33E-11               | 5.31E-05                | 0.000125                 |
| CBM68                        | 5.01E-05               | 8.99E-06                | 0.000182                 |
| CBM9                         | 8.88E-13               | 1.44E-11                | 2.22E-12                 |
| Carbohydrate esterases       |                        |                         |                          |
| CE3                          | 1.68E-10               | 7.47E-05                | 0.00062                  |
| CE9                          | 5.83E-19               | 7.37E-05                | 0.007305                 |
| Glycoside hydrolases         |                        |                         |                          |
| GH109                        | 1.80E-18               | 9.23E-08                | 1.92E-13                 |
| GH117                        | 1.25E-05               | 0.004221                | 0.003013                 |
| GH123                        | 0.003063               | 0.000606                | 0.001734                 |
| GH125                        | 4.14E-19               | 1.33E-16                | 1.59E-15                 |
| GH128                        | 2.16E-14               | 9.97E-07                | 4.18E-05                 |
| GH13                         | 0.004306               | 1.47E-07                | 0.007748                 |

|         |          |          |          |
|---------|----------|----------|----------|
| GH13_16 | 7.00E-05 | 0.00063  | 3.51E-05 |
| GH13_2  | 0.005224 | 0.0006   | 0.026906 |
| GH13_36 | 0.002131 | 0.003061 | 0.027897 |
| GH13_40 | 0.000141 | 1.57E-05 | 4.25E-07 |
| GH133   | 0.030687 | 1.47E-07 | 0.000337 |
| GH16    | 7.62E-10 | 6.74E-06 | 0.000368 |
| GH18    | 1.28E-07 | 2.39E-07 | 0.000111 |
| GH20    | 6.60E-12 | 0.000614 | 1.03E-05 |
| GH38    | 9.43E-46 | 1.51E-18 | 3.04E-43 |
| GH39    | 2.69E-07 | 0.000556 | 1.43E-10 |
| GH43_26 | 1.57E-05 | 0.000556 | 0.000556 |
| GH43_28 | 1.35E-16 | 3.00E-08 | 4.40E-06 |
| GH43_3  | 5.69E-08 | 7.45E-07 | 8.84E-19 |
| GH43_31 | 5.43E-07 | 0.000583 | 2.26E-07 |
| GH43_33 | 1.58E-06 | 2.24E-05 | 1.01E-13 |
| GH5     | 1.57E-22 | 1.80E-08 | 1.55E-15 |
| GH5_35  | 8.84E-13 | 0.001397 | 4.49E-06 |
| GH57    | 0.003543 | 0.005297 | 9.37E-05 |
| GH59    | 0.000148 | 0.003958 | 0.008335 |
| GH64    | 1.91E-09 | 1.87E-07 | 2.57E-09 |
| GH76    | 2.09E-20 | 1.55E-27 | 3.29E-16 |
| GH85    | 0.001061 | 0.002853 | 0.008951 |
| GH87    | 4.47E-10 | 2.62E-07 | 1.42E-07 |
| GH88    | 0.001577 | 0.00356  | 0.006143 |
| GH92    | 8.02E-20 | 3.58E-16 | 8.82E-23 |

|                       |          |          |          |
|-----------------------|----------|----------|----------|
| GH93                  | 1.65E-08 | 4.49E-06 | 3.88E-11 |
| GH99                  | 2.06E-07 | 2.73E-09 | 0.000163 |
| Glycosyltransferases  |          |          |          |
| GT1                   | 1.86E-05 | 1.86E-10 | 1.93E-05 |
| GT10                  | 2.68E-08 | 0.012407 | 0.005445 |
| GT2_Glyco_tranf_2_4   | 5.94E-21 | 0.000115 | 2.57E-07 |
| GT3                   | 0.008785 | 0.001394 | 0.001478 |
| GT39                  | 0.002494 | 0.021868 | 0.003876 |
| GT4                   | 7.61E-09 | 0.000752 | 0.018262 |
| GT47                  | 0.000453 | 0.011114 | 0.002988 |
| GT66                  | 2.68E-06 | 5.25E-05 | 0.008382 |
| GT70                  | 9.38E-07 | 0.000433 | 0.001094 |
| GT77                  | 0.002527 | 0.014307 | 0.009975 |
| GT8                   | 5.78E-21 | 0.000151 | 0.02682  |
| GT81                  | 1.55E-06 | 8.26E-06 | 0.025595 |
| GT83                  | 4.25E-39 | 4.13E-05 | 1.77E-06 |
| Polysaccharide lyases |          |          |          |
| PL17_2                | 2.55E-05 | 0.000285 | 0.00041  |
| PL22                  | 1.27E-06 | 0.005756 | 0.000133 |
| PL8                   | 0.003063 | 0.002491 | 0.006191 |

242

243 CAZymes are often found organised into Polysaccharide Utilization Loci (PUL) which comprise a set  
 244 of genes that enable the binding and degradation of specific carbohydrates or multiple  
 245 carbohydrates. We used the software PULpy to predict PULs which were present in our  
 246 *Bacteroidales* RUGs. Of the 136 RUGs which belong to the taxonomy *Bacteroidales*, 112 contain

247 putative PULs. Within these RUGs we identified 970 PULs, with numbers of PULs per RUG ranging  
248 from 1 to 35. The largest quantity of PULs originating from one RUG was 35 from uncultured  
249 *Bacteroidales* sp. RUG30227; these encoded a wide range of CAZymes. This RUG was more abundant  
250 in reindeer samples than samples from other ruminants. Of the 970 PULs, 332 of these were a single  
251 susC/D pair. A summary of identified PULs can be found in **Additional file 5 (Additional File 1: Fig 4)**.

252 We also examined the abundance of genes which belonged to specific KEGG orthologs. KEGG  
253 orthologs represent a wide range of molecular functions and are defined by a network-based  
254 classification. We found that, as for CAZymes, ruminant species clustered significantly by the  
255 abundance of genes with specific KEGG orthologs (PERMANOVA:  $P = 1e-05$ , **Fig 4**) and that the vast  
256 majority of orthologs were found in all ruminant species (**Fig 5**). However, the large amount of  
257 orthologs ( $n=729$ ) which were only found in the two domesticated species (cattle and sheep) is also  
258 worthy of note. It should also be noted that the two sheep samples did not cluster visually to the  
259 same extent as the samples originating from the other ruminant species (**Fig 4**). DeSeq2 was used to  
260 identify many KEGG orthologs which were significantly more abundant in one ruminant species vs  
261 another (**Additional file 6**). Those orthologs which were consistently more abundant in specific  
262 ruminant species (Adjusted p-value  $<0.05$ ) are listed in **Additional file 7**.

263

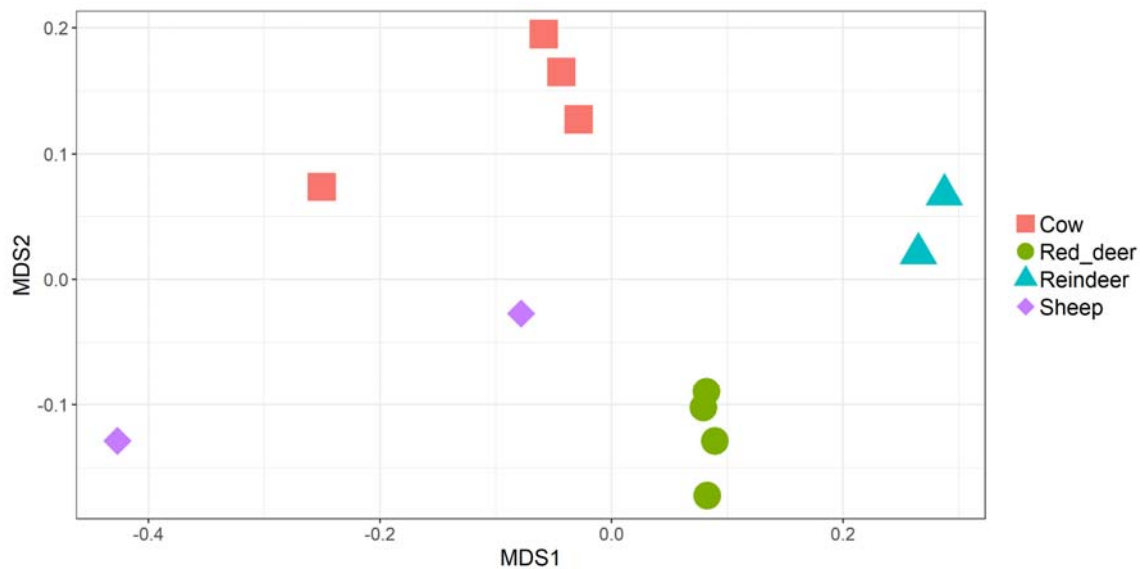

264

265 Fig 4: NMDS of ruminal samples clustered by abundance of KEGG orthologs, using Bray–Curtis  
266 dissimilarity values (PERMANOVA;  $P = 1e-05$ ).

267

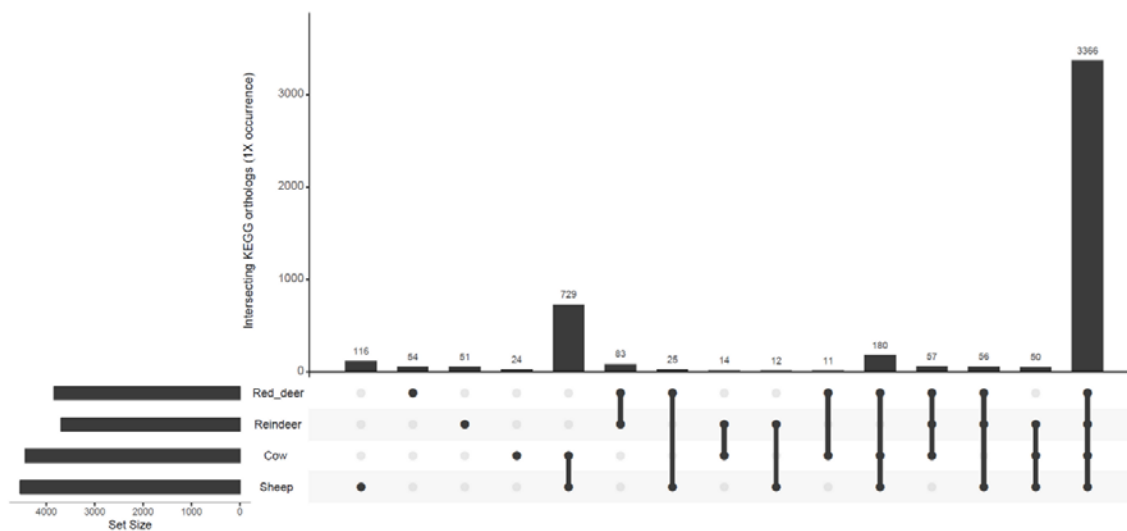

268

269 Fig 5: UpSetR graph showing the number of shared KEGG orthologs families at average 1X  
270 coverage within four ruminant species.

271 **Discussion:**

272 The rumen microbiota plays a crucial role in the ability of ruminants to efficiently digest feed while  
273 the rumen microbiota and their products also have a potential use in diverse industrial applications.  
274 The ruminal microbiota of red deer and reindeer have previously been studied using 16S rRNA gene  
275 sequencing (51-54). However, metagenomic studies of these species are limited, with only one study  
276 in reindeer (55) and no studies in red deer.

277 In this study we constructed 391 rumen microbial genomes from metagenomic data from cattle,  
278 sheep, red deer and reindeer. We assigned taxonomies to our RUGs using GTDB-Tk rather than NCBI  
279 based taxonomies as this improves the classification of uncultured bacteria due to the use of a  
280 genome-based taxonomy (32). We have also previously found less need to manually correct  
281 taxonomic assignments when using GTDB-Tk (21). Our microbes predominantly belonged to the  
282 *Bacteroidota* and *Firmicutes\_A*, with lesser numbers of 14 other phyla. We dereplicated our  
283 genomes alongside a superset of rumen bacterial genomes (20) and used the results output by  
284 GTDB-Tk to identify RUGs which represent novel microbial strains and species. Amongst our  
285 genomes we identified 372 novel strains and 279 novel species. These microbes were taxonomically  
286 diverse, belonging to 15 phyla. Only 31 RUGs were assigned an identity at species level.

287 The vast majority of our total RUGs were only present on average at  $\geq 1$  coverage in one ruminant  
288 species. However, we found that at higher taxonomic levels taxonomies were shared between  
289 sample types. When comparing the abundance of taxonomies between samples we found that  
290 ruminant species clustered separately by both higher (kingdom and phylum) and lower (family and  
291 genus) taxonomic levels. We are aware that the sample sizes for our study are small and therefore  
292 any conclusions about differences between the microbiota of ruminant species should be drawn  
293 cautiously. However, our data are supportive of the hypothesis that there are host species-specific  
294 rumen microbiota at the strain and species level but that these differences do not necessarily  
295 translate into large differences in the types of CAZymes expressed.

296 While we found that there were significant differences between the abundances of CAZymes  
297 between ruminant species, most CAZymes were present in all ruminant species. These results also  
298 reflected those which we found when analysing the abundance of KEGG orthologs. We also  
299 identified 970 PULs in our *Bacteroidales* RUGs, with numbers of PULs per genome ranging from 1 to  
300 35. The RUG containing 35 PULs was found most abundantly in reindeer samples, emphasising the  
301 potential for the discovery of novel carbohydrate-active enzymes in lesser studied ruminant species,  
302 as also highlighted by a previous study which identified multiple PULs in metagenomic samples from  
303 reindeer (55). Unfortunately due to the nature of our samples, with red deer and reindeer samples  
304 originating from animals eating a non-regimented diet, we are not able to provide metadata as to  
305 the exact nutritional composition of our animals' diets, therefore a more in depth analysis of dietary  
306 carbohydrates vs CAZyme/PUL abundance is not possible.

307 While several thousand RUGs have previously been published that originate from the rumen  
308 microbiota, the vast majority of these originate from cattle. By investing more effort in exploring the  
309 metagenome of less well studied ruminants we will be able to identify even more microbes and  
310 microbial products that are of industrial-interest. In conclusion, we present a dataset of RUGs from  
311 four ruminant species which can be used as a reference dataset in future metagenomic studies and  
312 to aid in the design of culture based studies.

313

314 **Author statements:**

315 **Authors and contributors:**

316 LG contributed to methodology, formal analysis, data curation, writing (original draft preparation)  
317 and visualisation. BG and RJW contributed to conceptualisation, methodology, investigation,  
318 resources and writing (review and editing). RJW also contributed to supervision and project  
319 administration. MW contributed to conceptualisation, methodology, formal analysis, writing (review

320 and editing), visualisation, supervision and project administration. All authors read and approved the  
321 final manuscript.

322

323 **Conflicts of interest:**

324 The authors declare that there are no conflicts of interest

325

326 **Funding information:**

327 The Roslin Institute forms part of the Royal (Dick) School of Veterinary Studies, University of  
328 Edinburgh. This project was supported by the Biotechnology and Biological Sciences Research  
329 Council, including institute strategic programme and national capability awards to The Roslin  
330 Institute (BBSRC: BB/P013759/1, BB/P013732/1, BB/J004235/1, BB/J004243/1), and the Technology  
331 Strategy Board (TS/J000108/1, TS/J000116/1). The Rowett Institute is funded by the Rural and  
332 Environment Science and Analytical Services Division (RESAS) of the Scottish Government. The  
333 funding bodies had no role in the study design, the collection, analysis, and interpretation of data or  
334 the writing of the manuscript. Sequencing was carried out by Edinburgh Genomics.

335

336 **Ethical approval:**

337 Cattle projects were carried out under Home Office PPL 30/2579. Sheep experimentation was  
338 carried out under the conditions set out by UK Home Office licence no. 604028, procedure reference  
339 number 8.

340

341 **Consent for publication:**



342 Not applicable.

343

344 **Acknowledgments:**

345 BG thanks the Higher Education Council of the Turkish Republic for the award of a travelling  
346 fellowship. We thank Bob Mayes and Dave Hamilton of the James Hutton Institute for their  
347 permission and help in sampling the sheep digesta, Kevin Shingfield for the provision of reindeer  
348 digesta samples, and Euan Munro for red deer digesta samples. We also thank Nest McKain of RI for  
349 technical assistance.

350

351 **References:**

- 352 1. Lima J, Auffret MD, Stewart RD, Dewhurst RJ, Duthie CA, Snelling TJ, et al. Identification of  
353 rumen microbial genes involved in pathways linked to appetite, growth, and feed conversion  
354 efficiency in cattle. *Front Genet.* 2019;**10**: 701 doi: 10.3389/fgene.2019.00701
- 355 2. Ben Shabat SK, Sasson G, Doron-Faigenboim A, Durman T, Yaacoby S, Miller MEB, et al.  
356 Specific microbiome-dependent mechanisms underlie the energy harvest efficiency of ruminants.  
357 *Isme J.* 2016;**10**: 2958-72 doi: 10.1038/ismej.2016.62
- 358 3. Patil RD, Ellison MJ, Wolff SM, Shearer C, Wright AM, Cockrum RR, et al. Poor feed efficiency  
359 in sheep is associated with several structural abnormalities in the community metabolic network of  
360 their ruminal microbes. *J Anim Sci.* 2018;**96**: 2113-24 doi: 10.1093/jas/sky096
- 361 4. Jami E, White BA, Mizrahi I. Potential role of the bovine rumen microbiome in modulating  
362 milk composition and feed efficiency. *PLoS One.* 2014;**9**: e85423 doi: 10.1371/journal.pone.0085423
- 363 5. Scharen M, Frahm J, Kersten S, Meyer U, Hummel J, Breves G, et al. Interrelations between  
364 the rumen microbiota and production, behavioral, rumen fermentation, metabolic, and  
365 immunological attributes of dairy cows. *J Dairy Sci.* 2018;**101**: 4615-37 doi: 10.3168/jds.2017-13736

- 366 6. Ribeiro GO, Gruninger RJ, Badhan A, McAllister TA. Mining the rumen for fibrolytic feed  
367 enzymes. *Anim Front.* 2016;**6**: 20-6 doi: 10.2527/af.2016-0019
- 368 7. Huws SA, Creevey CJ, Oyama LB, Mizrahi I, Denman SE, Popova M, et al. Addressing global  
369 ruminant agricultural challenges through understanding the rumen microbiome: Past, present, and  
370 future. *Front Microbiol.* 2018;**9**: 33 doi: 10.3389/fmicb.2018.02161
- 371 8. Solbak AI, Richardson TH, McCann RT, Kline KA, Bartnek F, Tomlinson G, et al. Discovery of  
372 pectin-degrading enzymes and directed evolution of a novel pectate lyase for processing cotton  
373 fabric. *J Biol Chem.* 2005;**280**: 9431-8 doi: 10.1074/jbc.M411838200
- 374 9. Singh B, Gautam SK, Verma V, Kumar M, Singh B. Metagenomics in animal gastrointestinal  
375 ecosystem: Potential biotechnological prospects. *Anaerobe.* 2008;**14**: 138-44 doi:  
376 10.1016/j.anaerobe.2008.03.002
- 377 10. Ufarte L, Laville E, Duquesne S, Morgavi D, Robe P, Klopp C, et al. Discovery of carbamate  
378 degrading enzymes by functional metagenomics. *PLoS One.* 2017;**12**: e0189201 doi:  
379 10.1371/journal.pone.0189201
- 380 11. Hess M, Sczyrba A, Egan R, Kim TW, Chokhawala H, Schroth G, et al. Metagenomic discovery  
381 of biomass-degrading genes and genomes from cow rumen. *Science.* 2011;**331**: 463-7 doi:  
382 10.1126/science.1200387
- 383 12. Wallace RJ, Rooke JA, McKain N, Duthie CA, Hyslop JJ, Ross DW, et al. The rumen microbial  
384 metagenome associated with high methane production in cattle. *BMC Genomics.* 2015;**16**: 839 doi:  
385 10.1186/s12864-015-2032-0
- 386 13. Difford GF, Plichta DR, Lovendahl P, Lassen J, Noel SJ, Hojberg O, et al. Host genetics and the  
387 rumen microbiome jointly associate with methane emissions in dairy cows. *PLoS Genet.* 2018;**14**:  
388 e1007580 doi: 10.1371/journal.pgen.1007580
- 389 14. Shi WB, Moon CD, Leahy SC, Kang DW, Froula J, Kittelmann S, et al. Methane yield  
390 phenotypes linked to differential gene expression in the sheep rumen microbiome. *Genome Res.*  
391 2014;**24**: 1517-25 doi: 10.1101/gr.168245.113

- 392 15. Auffret MD, Stewart R, Dewhurst RJ, Duthie CA, Rooke JA, Wallace RJ, et al. Identification,  
393 comparison, and validation of robust rumen microbial biomarkers for methane emissions using  
394 diverse *Bos taurus* breeds and basal diets. *Front Microbiol.* 2018;**8**: 2642 doi:  
395 10.3389/fmicb.2017.02642
- 396 16. Roehe R, Dewhurst RJ, Duthie CA, Rooke JA, McKain N, Ross DW, et al. Bovine host genetic  
397 variation influences rumen microbial methane production with best selection criterion for low  
398 methane emitting and efficiently feed converting hosts based on metagenomic gene abundance.  
399 *PLoS Genet.* 2016;**12**: 20 doi: 10.1371/journal.pgen.1005846
- 400 17. Seshadri R, Leahy SC, Attwood GT, Teh KH, Lambie SC, Cookson AL, et al. Cultivation and  
401 sequencing of rumen microbiome members from the Hungate1000 Collection. *Nat Biotechnol.*  
402 2018;**36**: 359-67 doi: 10.1038/nbt.4110
- 403 18. Creevey CJ, Kelly WJ, Henderson G, Leahy SC. Determining the culturability of the rumen  
404 bacterial microbiome. *Microb Biotechnol.* 2014;**7**: 467-79 doi: 10.1111/1751-7915.12141
- 405 19. Stewart RD, Auffret MD, Warr A, Wiser AH, Press MO, Langford KW, et al. Assembly of 913  
406 microbial genomes from metagenomic sequencing of the cow rumen. *Nat Commun.* 2018;**9**: 870  
407 doi: 10.1038/s41467-018-03317-6
- 408 20. Stewart RD, Auffret MD, Warr A, Walker AW, Roehe R, Watson M. Compendium of 4,941  
409 rumen metagenome-assembled genomes for rumen microbiome biology and enzyme discovery. *Nat*  
410 *Biotechnol.* 2019;**37**: 953-61 doi: 10.1038/s41587-019-0202-3
- 411 21. Glendinning L, Stewart RD, Pallen MJ, Watson KA, Watson M. Assembly of hundreds of novel  
412 bacterial genomes from the chicken caecum. *Genome Biol.* 2020;**21**: 16 doi: 10.1186/s13059-020-  
413 1947-1
- 414 22. McKain N, Genc B, Snelling TJ, Wallace RJ. Differential recovery of bacterial and archaeal 16S  
415 rRNA genes from ruminal digesta in response to glycerol as cryoprotectant. *J Microbiol Methods.*  
416 2013;**95**: 381-3 doi: 10.1016/j.mimet.2013.10.009

- 417 23. Yu ZT, Morrison M. Improved extraction of PCR-quality community DNA from digesta and  
418 fecal samples. *Biotechniques*. 2004;**36**: 808-12 doi: 10.2144/04365st04
- 419 24. Bolger AM, Lohse M, Usadel B. Trimmomatic: A flexible trimmer for Illumina sequence data.  
420 *Bioinformatics*. 2014;**30**: 2114-20 doi: 10.1093/bioinformatics/btu170
- 421 25. Peng Y, Leung HCM, Yiu SM, Chin FYL. IDBA-UD: a de novo assembler for single-cell and  
422 metagenomic sequencing data with highly uneven depth. *Bioinformatics*. 2012;**28**: 1420-8 doi:  
423 10.1093/bioinformatics/bts174
- 424 26. Li H. Aligning sequence reads, clone sequences and assembly contigs with BWA-MEM. 2013  
425 arXiv:13033997
- 426 27. Li H, Handsaker B, Wysoker A, Fennell T, Ruan J, Homer N, et al. The Sequence  
427 Alignment/Map format and SAMtools. *Bioinformatics*. 2009;**25**: 2078-9 doi:  
428 10.1093/bioinformatics/btp352
- 429 28. Kang DWD, Froula J, Egan R, Wang Z. MetaBAT, an efficient tool for accurately  
430 reconstructing single genomes from complex microbial communities. *PeerJ*. 2015;**3**: 15 doi:  
431 10.7717/peerj.1165
- 432 29. Li DH, Liu CM, Luo RB, Sadakane K, Lam TW. MEGAHIT: An ultra-fast single-node solution for  
433 large and complex metagenomics assembly via succinct de Bruijn graph. *Bioinformatics*. 2015;**31**:  
434 1674-6 doi: 10.1093/bioinformatics/btv033
- 435 30. Olm MR, Brown CT, Brooks B, Banfield JF. dRep: a tool for fast and accurate genomic  
436 comparisons that enables improved genome recovery from metagenomes through de-replication.  
437 *ISME J*. 2017;**11**: 2864-8 doi: 10.1038/ismej.2017.126
- 438 31. Stewart RD, Watson M, Auffret MD, Roehe R, Snelling TJ. MAGpy: A reproducible pipeline for  
439 the downstream analysis of metagenome-assembled genomes (MAGs). *Bioinformatics*. 2018;**35**:  
440 2150–2 doi: 10.1093/bioinformatics/bty905

- 441 32. Parks DH, Chuvochina M, Waite DW, Rinke C, Skarszewski A, Chaumeil PA, et al. A  
442 standardized bacterial taxonomy based on genome phylogeny substantially revises the tree of life.  
443 Nat Biotechnol. 2018;**36**: 996-1004 doi: 10.1038/nbt.4229
- 444 33. Rambaut A. FigTree v1. 4. <http://treebioedacuk/software/figtree20122012>.
- 445 34. Asnicar F, Weingart G, Tickle TL, Huttenhower C, Segata N. Compact graphical  
446 representation of phylogenetic data and metadata with GraPhlAn. PeerJ. 2015;**3**: e1029 doi:  
447 10.7717/peerj.1029
- 448 35. Cantarel BL, Coutinho PM, Rancurel C, Bernard T, Lombard V, Henrissat B. The Carbohydrate-  
449 Active EnZymes database (CAZy): An expert resource for glycogenomics. Nucleic Acids Res. 2009;**37**:  
450 D233-D8 doi: 10.1093/nar/gkn663
- 451 36. Kanehisa M, Goto S. KEGG: Kyoto Encyclopedia of Genes and Genomes. Nucleic Acids Res.  
452 2000;**28**: 27-30 doi: 10.1093/nar/28.1.27
- 453 37. Buchfink B, Xie C, Huson DH. Fast and sensitive protein alignment using DIAMOND. Nat  
454 Methods. 2015;**12**: 59-60 doi: 10.1038/nmeth.3176
- 455 38. Stewart RD, Auffret MD, Roehe R, Watson M. Open prediction of polysaccharide utilisation  
456 loci (PUL) in 5414 public *Bacteroidetes* genomes using PULpy. preprint in bioRxiv. 2018: 421024 doi:  
457 10.1101/421024
- 458 39. Wickham H. ggplot2: elegant graphics for data analysis. <http://ggplot2org20162016>.
- 459 40. Oksanen J, Blanchet FG, Friendly M, Kindt R, Legendre P, Minchin DMPR, et al. vegan:  
460 Community Ecology Package. <https://CRANR-projectorg/package=vegan20132018>.
- 461 41. Love MI, Huber W, Anders S. Moderated estimation of fold change and dispersion for RNA-  
462 seq data with DESeq2. Genome Biol. 2014;**15**: 550 doi: 10.1186/s13059-014-0550-8
- 463 42. Conway JR, Lex A, Gehlenborg N. UpSetR: An R package for the visualization of intersecting  
464 sets and their properties. Bioinformatics. 2017;**33**: 2938-40 doi: 10.1093/bioinformatics/btx364
- 465 43. Wood DE, Salzberg SL. Kraken: Ultrafast metagenomic sequence classification using exact  
466 alignments. Genome Biol. 2014;**15**: R46 doi: 10.1186/gb-2014-15-3-r46

- 467 44. Bowers RM, Kyrpides NC, Stepanauskas R, Harmon-Smith M, Doud D, Reddy TBK, et al.  
468 Minimum information about a single amplified genome (MISAG) and a metagenome-assembled  
469 genome (MIMAG) of bacteria and archaea. *Nat Biotechnol.* 2017;**35**: 725-31 doi: 10.1038/nbt.3893
- 470 45. Parks DH, Rinke C, Chuvochina M, Chaumeil PA, Woodcroft BJ, Evans PN, et al. Recovery of  
471 nearly 8,000 metagenome-assembled genomes substantially expands the tree of life. *Nat Microbiol.*  
472 2017;**2**: 1533-42 doi: 10.1038/s41564-017-0012-7
- 473 46. Solden LM, Naas AE, Roux S, Daly RA, Collins WB, Nicora CD, et al. Interspecies cross-feeding  
474 orchestrates carbon degradation in the rumen ecosystem. *Nat Microbiol.* 2018;**3**: 1274-84 doi:  
475 10.1038/s41564-018-0225-4
- 476 47. Svartstrom O, Alneberg J, Terrapon N, Lombard V, de Bruijn I, Malmsten J, et al. Ninety-nine  
477 de novo assembled genomes from the moose (*Alces alces*) rumen microbiome provide new insights  
478 into microbial plant biomass degradation. *Isme J.* 2017;**11**: 2538-51 doi: 10.1038/ismej.2017.108
- 479 48. Neumann AP, Suen G. The phylogenomic diversity of herbivore-associated *Fibrobacter* spp.  
480 is correlated to lignocellulose-degrading potential. *mSphere.* 2018;**3**: e00593-18 doi:  
481 10.1128/mSphere.00593-18
- 482 49. Shoseyov O, Shani Z, Levy I. Carbohydrate binding modules: Biochemical properties and  
483 novel applications. *Microbiol Mol Biol Rev.* 2006;**70**: 283-95 doi: 10.1128/membr.00028-05
- 484 50. Levasseur A, Drula E, Lombard V, Coutinho PM, Henrissat B. Expansion of the enzymatic  
485 repertoire of the CAZy database to integrate auxiliary redox enzymes. *Biotechnol Biofuels.* 2013;**6**:  
486 41 doi: 10.1186/1754-6834-6-41
- 487 51. Ostbye K, Wilson R, Rudi K. Rumen microbiota for wild boreal cervids living in the same  
488 habitat. *FEMS Microbiol Lett.* 2016;**363**: fnw233 doi: 10.1093/femsle/fnw233
- 489 52. Salgado-Flores A, Hagen LH, Ishaq SL, Zamanzadeh M, Wright ADG, Pope PB, et al. Rumen  
490 and cecum microbiomes in reindeer (*Rangifer tarandus tarandus*) Are changed in response to a  
491 lichen diet and may affect enteric methane emissions. *PLoS One.* 2016;**11**: e0155213 doi:  
492 10.1371/journal.pone.0155213

- 493 53. Sundset M, Edwards J, Cheng Y, Senosiain R, Fraile M, Northwood K, et al. Molecular  
494 diversity of the rumen microbiome of Norwegian reindeer on natural summer pasture. *Microb Ecol.*  
495 2009;**57**: 335-48 doi: 10.1007/s00248-008-9414-7
- 496 54. Qian WX, Ao WP, Jia CH, Li ZP. Bacterial colonisation of reeds and cottonseed hulls in the  
497 rumen of Tarim red deer (*Cervus elaphus yarkandensis*). *Antonie Van Leeuwenhoek.* 2019;**112**: 1283-  
498 96 doi: 10.1007/s10482-019-01260-0
- 499 55. Pope PB, Mackenzie AK, Gregor I, Smith W, Sundset MA, McHardy AC, et al. Metagenomics  
500 of the Svalbard reindeer rumen microbiome reveals abundance of polysaccharide utilization loci.  
501 *PLoS One.* 2012;**7**: e38571 doi: 10.1371/journal.pone.0038571
- 502

503 **Supporting data:**

504 **Additional file 1.docx: S1 Figures** - Supplementary figures 1 to 4.

505 **Additional file 2.xls: Dataset 1** - Average coverage of RUGs in all samples. Coverage was calculated  
506 by mapping the RUG scaffolds to adaptor-trimmed Illumina reads.

507 **Additional file 3.xls: Dataset 2** - Description of each RUG, including taxonomy, novelty, genome  
508 completeness, genome contamination, genome size, number of ambiguous bases, number of  
509 scaffolds, number of contigs, N50 (scaffolds), N50 (contigs), mean scaffold length, mean contig  
510 length, longest contig and GC content.

511 **Additional file 4.xls: Dataset 3** - CAZymes which were more abundant in sheep, cattle, reindeer or  
512 red deer (DeSeq2: Adjusted p-value <0.05).

513 **Additional file 5: Dataset 4** - Summary of polysaccharide utilisation loci found in *Bacteroidales* RUGs.

514 **Additional file 6: Dataset 5** - KEGG orthologs which were more abundant in sheep, cattle, reindeer  
515 or red deer (DeSeq2: Adjusted p-value <0.05).

516 **Additional file 7: Dataset 6** - KEGG orthologs which were consistently more abundant in sheep,  
517 cattle, reindeer or red deer (DeSeq2: Adjusted p-value <0.05).



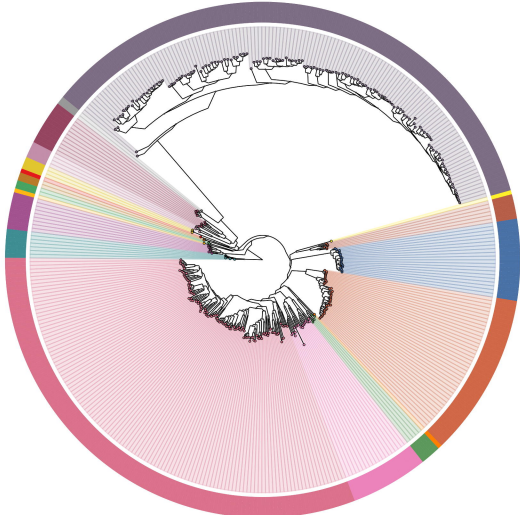

- Desulfovibrionia
- Alphaproteobacteria
- Synergistia
- Methanobacteria
- Endomicrobia
- Spirochaetia
- Bacteroidia
- Vampirovibrionia
- Negativicutes
- Anaerolineae
- Elusimicrobia
- Actinobacteria
- UBA1177
- UBA8953
- Coriobacteriia
- Clostridia
- Bacilli
- Gammaproteobacteria
- Fibrobacteria

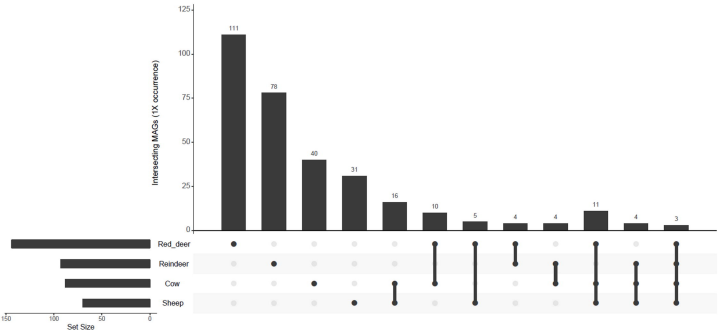

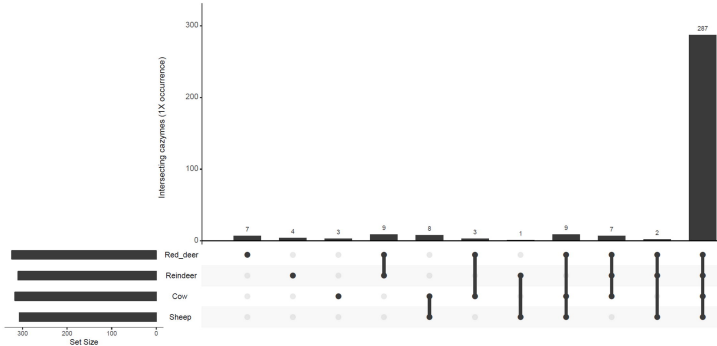

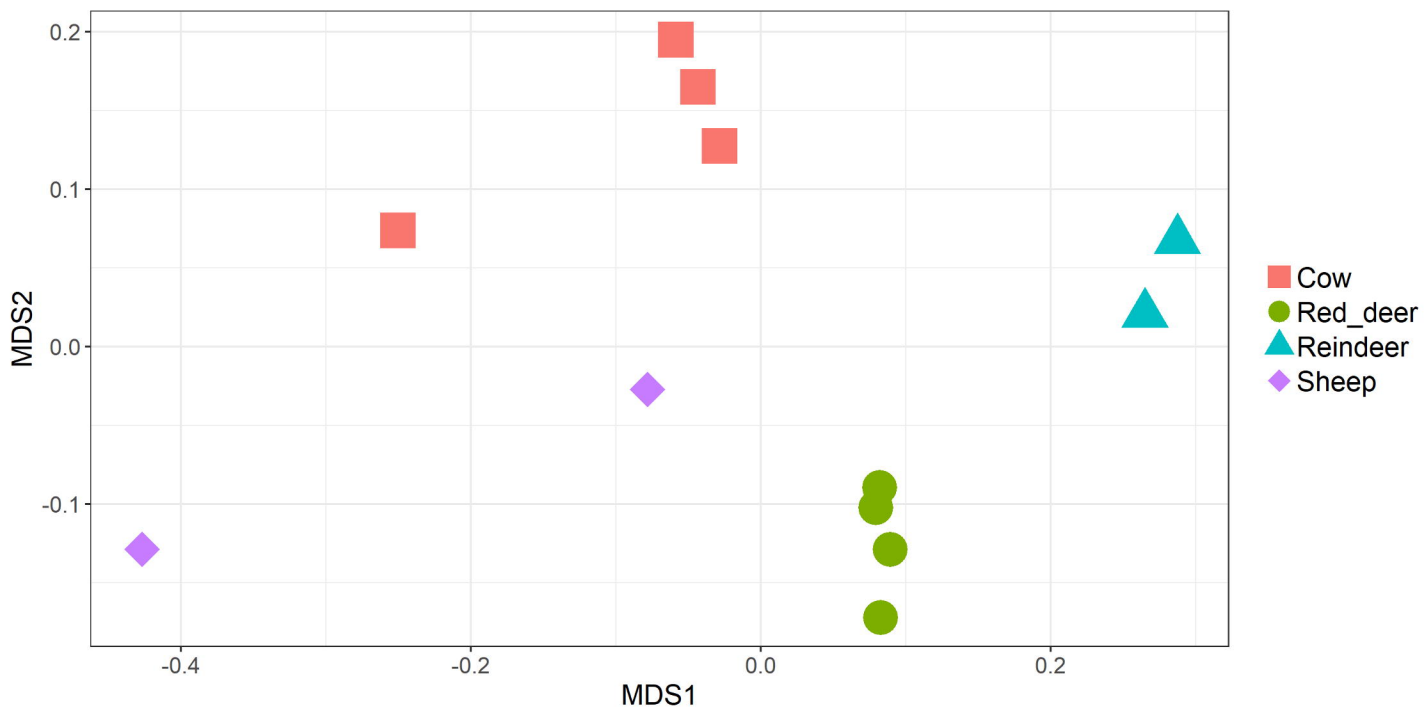

Source: https://www.biorxiv.org/content/10.1101/2020.02.12.945139v2.full.pdf
